# Supplementary material for: YCuTe2: a member of a new class of thermoelectric materials with CuTe4-based layered structure
Source: Royal Society of Chemistry journal article supplement (doi:10.1039/c5ta10330d), 2016-01-01
Supplement: c5ta10330d1.pdf [file c5ta10330d1.pdf]

## Supporting Information

### YCuTe<sub>2</sub>: A Member of A New Class of Thermoelectric Materials with CuTe<sub>4</sub>-Based Layered Structure

Umut Aydemir,<sup>a,b\*</sup> Jan-Hendrik Pöhls,<sup>c</sup> Hong Zhu,<sup>d,e</sup> Geoffroy Hautier,<sup>f</sup> Saurabh Bajaj,<sup>g</sup> Zachary M. Gibbs,<sup>a</sup> Wei Chen,<sup>g</sup> Guodong Li,<sup>a,b</sup> Saneyuki Ohno,<sup>a,b</sup> Danny Broberg,<sup>h</sup> Stephen Dongmin Kang,<sup>a,b</sup> Mark Asta,<sup>h</sup> Gerbrand Ceder,<sup>d,g,h</sup> Mary Anne White,<sup>c</sup> Kristin Persson,<sup>g,h</sup> Anubhav Jain,<sup>g</sup> and G. Jeffrey Snyder<sup>a,b\*</sup>

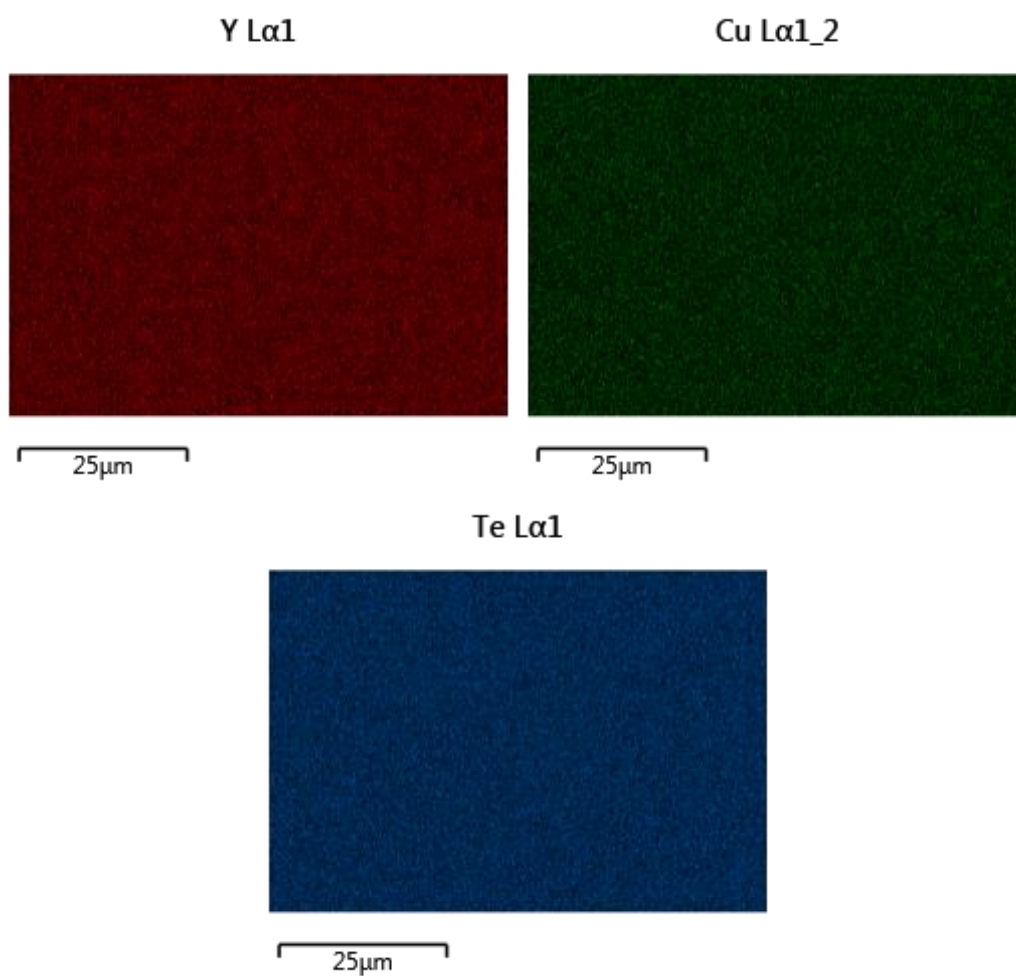

**Figure S1:** EDS mapping of a YCuTe<sub>2</sub> sample (the target phase) showing homogeneously distributed Y, Cu and Te atoms.

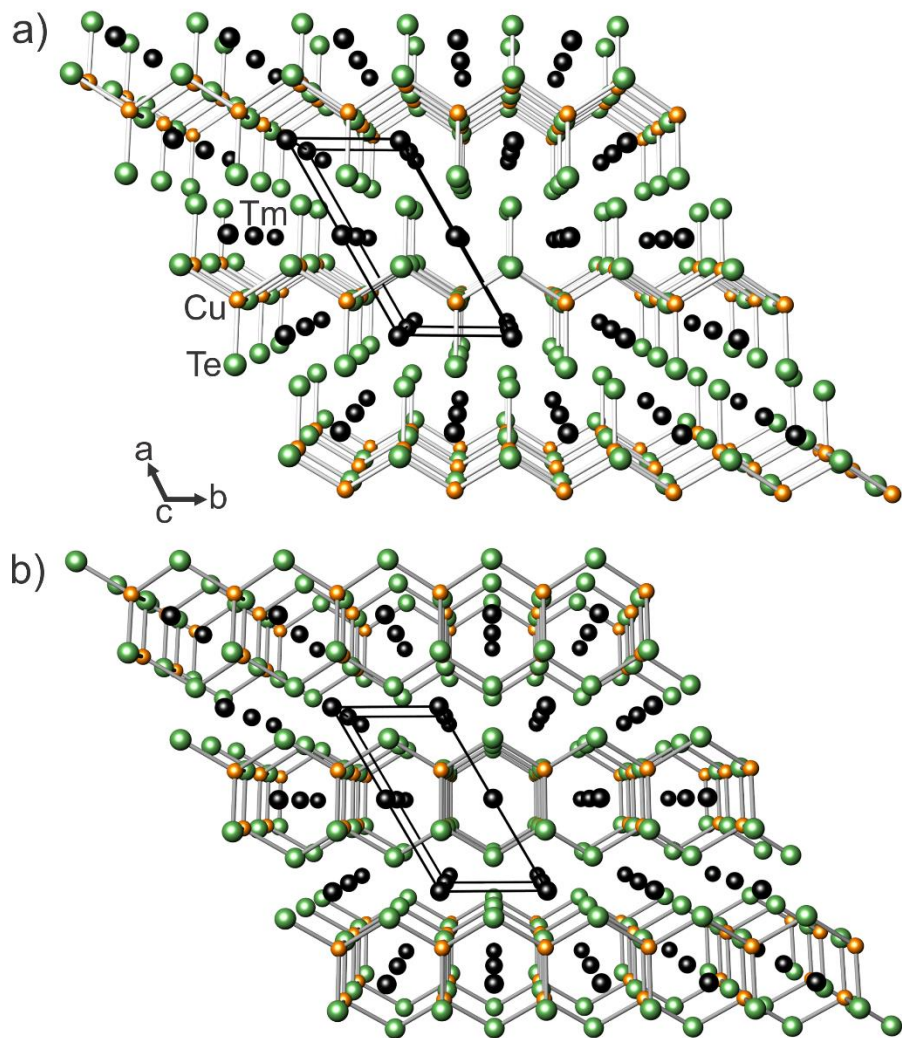

**Figure S2:** The low (a) and high (b) energy configuration of the low-temperature YCuTe<sub>2</sub> phase based on the total energy calculations. The configurations were constructed based on  $2 \times 1 \times 1$  supercell.

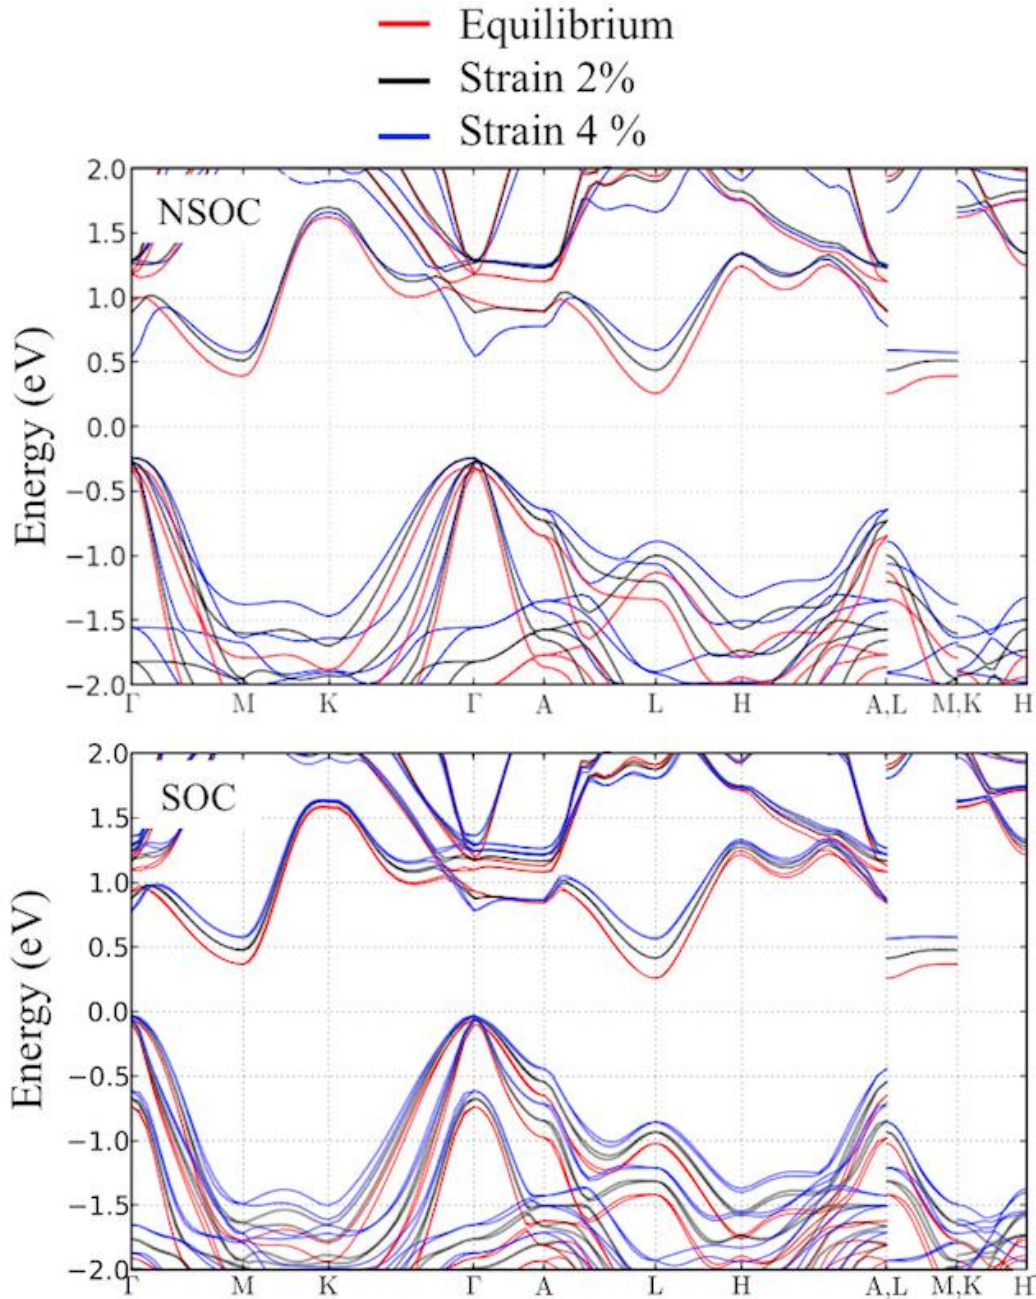

**Figure S3:** The electronic band structure for the high-temperature phase of YCuTe<sub>2</sub> with the equilibrium lattice parameter (shown in red) and at 2% (black) and 4 % (blue) extensive lattice strain computed with (lower) and without (upper) consideration of spin-orbit coupling (SOC).

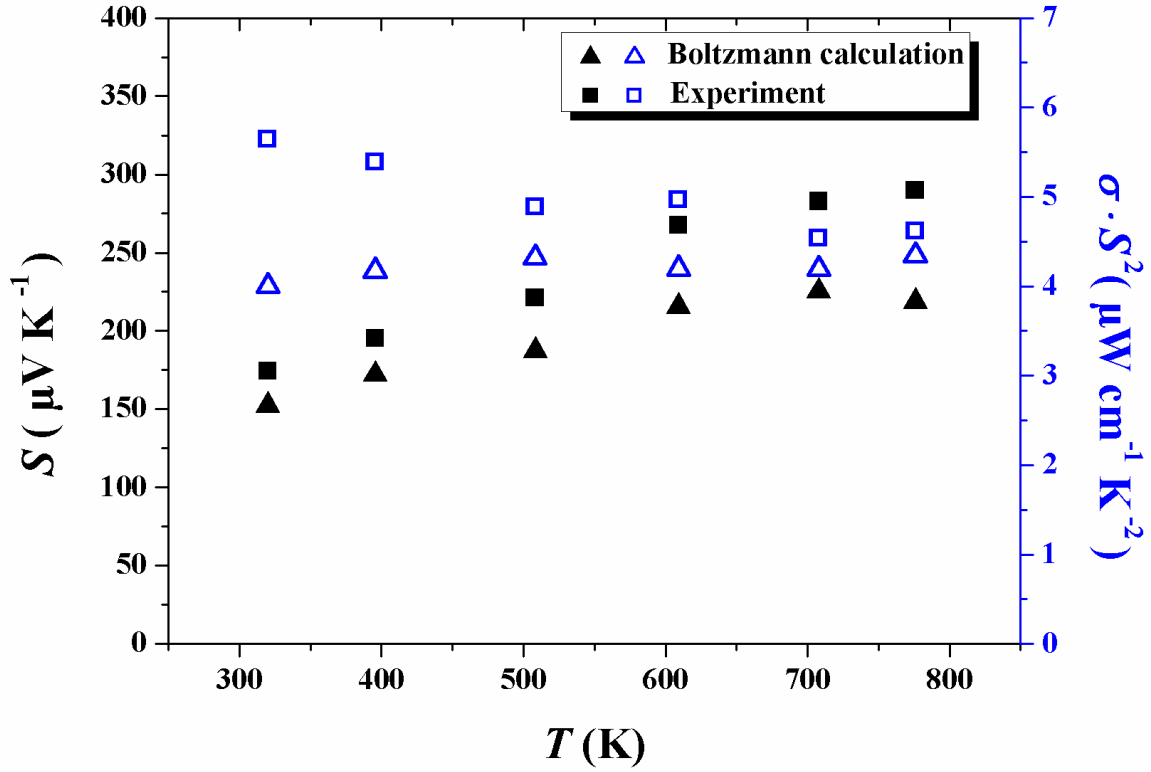

**Figure S4:** Experimental Seebeck coefficient (■) and power factor (□) of YCuTe<sub>2</sub> compared to the calculated data using Boltzmann transport equations (Seebeck: ▲; power factor: Δ), with temperature-dependent relaxation time as described in the main text. Seebeck coefficient is underestimated at high temperatures due to increasing effective mass.

**Table S1:** Atomic coordinates, displacement parameters (in Å<sup>2</sup>) and site occupancy factor (*SOF*) of LT- $\text{YCu}_{1.04}\text{Te}_2$  in  $P-3m1$  ( $R_i = 0.06$ ;  $R_p = 0.19$ ,  $R_{wp} = 0.21$ ). Standard deviations are provided in parentheses.

| Atom | Site       | <i>x</i>  | <i>y</i>    | <i>z</i>  | $U_{\text{iso}}$ | <i>SOF</i> |
|------|------------|-----------|-------------|-----------|------------------|------------|
| Y1   | 2 <i>c</i> | 0         | 0           | 0.2369(7) | 0.018(3)         | 1          |
| Y2   | 6 <i>i</i> | 0.4987(5) | 1- <i>x</i> | 0.2555(6) | 0.0213(11)       | 1          |
| Cu1  | 2 <i>d</i> | 1/3       | 2/3         | 0.4309(7) | 0.019(6)         | 1          |
| Cu2  | 6 <i>i</i> | 0.162(1)  | 1- <i>x</i> | 0.0681(5) | 0.035(4)         | 0.656(7)   |
| Cu3  | 6 <i>i</i> | 0.838(1)  | 1- <i>x</i> | 0.4232(6) | 0.036(7)         | 0.516(7)   |
| Te1  | 2 <i>d</i> | 1/3       | 2/3         | 0.1178(4) | 0.014(2)         | 1          |
| Te2  | 2 <i>d</i> | 1/3       | 2/3         | 0.6230(4) | 0.010(2)         | 1          |
| Te3  | 6 <i>i</i> | 0.8257(3) | 1- <i>x</i> | 0.1209(2) | 0.0109(7)        | 1          |
| Te4  | 6 <i>i</i> | 0.1664(3) | 1- <i>x</i> | 0.3816(2) | 0.0105(7)        | 1          |

**Table S2:** Atomic coordinates, displacement parameters (in Å<sup>2</sup>) and site occupancy factor (*SOF*) of HT- $\text{YCu}_{1.04}\text{Te}_2$  in  $P-3$  ( $R_i = 0.05$ ;  $R_p = 0.16$ ,  $R_{wp} = 0.20$ ). Standard deviations are provided in parentheses.

| Atom | Site       | <i>x</i> | <i>y</i> | <i>z</i>  | $U_{\text{iso}}$ | <i>SOF</i> |
|------|------------|----------|----------|-----------|------------------|------------|
| Y1   | 1 <i>a</i> | 0        | 0        | 0         | 0.014(2)         | 1          |
| Cu1  | 2 <i>d</i> | 1/3      | 2/3      | 0.6322(7) | 0.016(3)         | 0.670(6)   |
| Te1  | 2 <i>d</i> | 1/3      | 2/3      | 0.2525(3) | 0.009(2)         | 1          |

**Table S3:** Selected interatomic distances for LT- $\text{YCu}_{1.04}\text{Te}_2$  in  $P-3m1$  with their multiplicity (*n*).

| Atoms    | <i>n</i> | <i>d</i> (Å) |
|----------|----------|--------------|
| Y1 -Te3  | 3×       | 3.056(5)     |
| -Te4     | 3×       | 3.189(6)     |
| Y2 -Te2  | 1×       | 3.016(6)     |
| -Te4     | 2×       | 3.031(6)     |
| -Te3     | 2×       | 3.071(6)     |
| -Te1     | 1×       | 3.117(6)     |
| Cu1 -Te4 | 3×       | 2.582(4)     |
| -Te2     | 1×       | 2.657(11)    |
| Cu2 -Te3 | 2×       | 2.619(9)     |
| -Te3     | 1×       | 2.612(7)     |
| -Te1     | 1×       | 2.644(9)     |
| Cu3 -Te4 | 2×       | 2.518(11)    |
| -Te2     | 1×       | 2.634(11)    |
| -Te4     | 1×       | 2.698(8)     |

**Table S4:** Selected interatomic distances for HT-YCu<sub>1.04</sub>Te<sub>2</sub> in *P*-3 with their multiplicity (*n*).

| <b>Atoms</b> | <b><i>n</i></b> | <b><i>d</i> (Å)</b> |
|--------------|-----------------|---------------------|
| Y1 -Te1      | 6×              | 3.053(1)            |
| Cu1 -Te1     | 3×              | 2.624(2)            |
|              | 1×              | 2.635(5)            |
